# Supplementary material for: Towards a Psychological Construct of Being Moved
Source: PubMed Central journal article supplement (PMC4456364; doi:10.1371/journal.pone.0128451), 2015-06-04

### Checking grammatical form effects

To check for effects of the grammatical form, we conducted two MANOVAs on the emotional states for which we collected data with two different verbal primes (*being stirred*<sub>noun</sub> [Rührung; noun]/ *stirred* [gerührt; participle]; *sadness* [Traurigkeit; noun]/ *sad* [traurig; adjective]; *joy* [Freude; noun]/ *to be delighted* [sich freuen; verb]; and *fear* [Angst; noun]/ *to be afraid* [sich fürchten; verb]). One MANOVA tested the emotional state variable with the levels *being moved* and *sadness* and the word type variable with the levels noun vs. participle/adjective; the second MANOVA tested the emotional state variable with the levels *joy* and *fear* and the word type variable with the levels noun vs. verb.

The MANOVA for emotional state (*being stirred* vs. *sadness*) and word type (noun vs. adjective/participle) only showed a nonsignificant trend for word type (Wilk's  $\lambda = 0.517$ ;  $F(40,67) = 1.56$ ;  $p = .052$ ). There was a significant effect of emotional state (Wilk's  $\lambda = 0.262$ ;  $F(40,67) = 4.72$ ;  $p < .001$ ), reflecting the differences between the profiles for the emotional states of sadness and being stirred. The interaction of word type and emotional state was not significant either (Wilk's  $\lambda = 0.597$ ;  $F(40,67) = 1.13$ ;  $p = .325$ ; see Figure A left).

The MANOVA for emotional state (*joy* vs. *fear*) and word type (noun vs. verb) showed no significant effect of word type (Wilk's  $\lambda = 0.642$ ;  $F(40,77) = 1.07$ ;  $p = .39$ ). Again, there was a significant effect of emotional state (Wilk's  $\lambda = 0.137$ ;  $F(40,77) = 12.08$ ;  $p < .001$ ), reflecting the differences in the profiles between the emotional states of joy and fear. The interaction of word type and emotional state was not significant either (Wilk's  $\lambda = 0.694$ ;  $F(40,77) = 0.85$ ;  $p = .71$ ; see Figure A right).

**Figure A.** Semantic differential profiles (left: contrasting grammatical forms / joy & fear; right: contrasting grammatical forms / being moved & sadness).

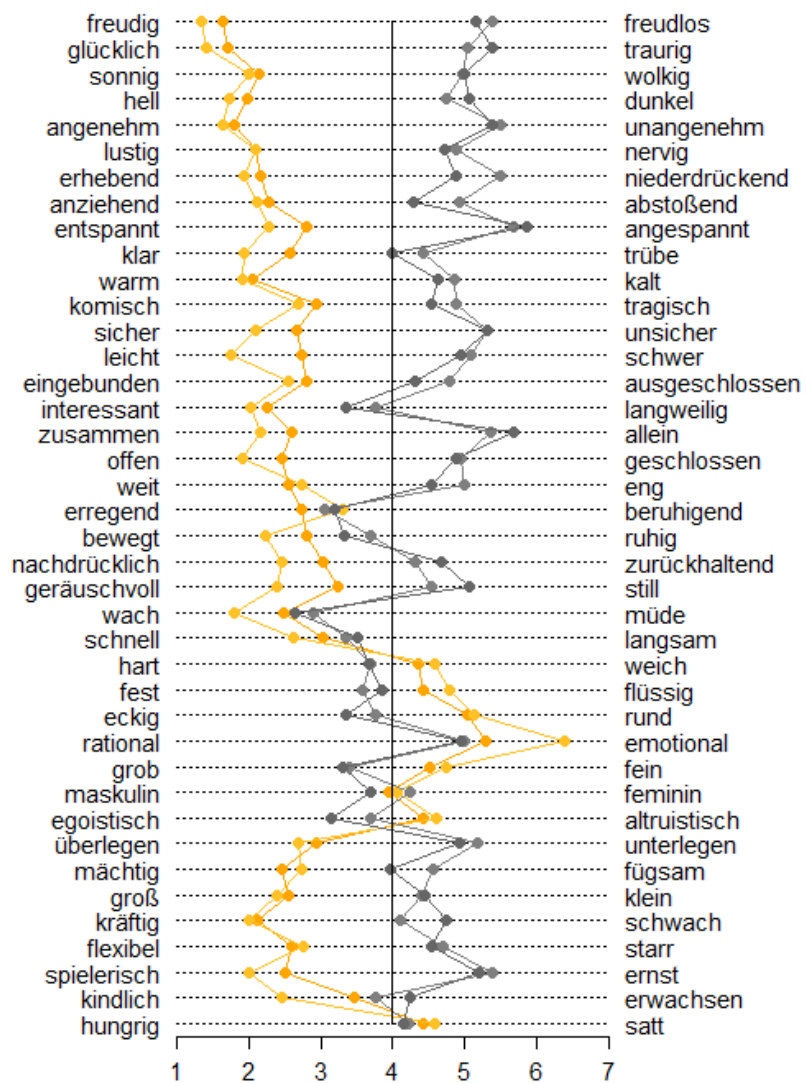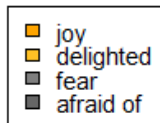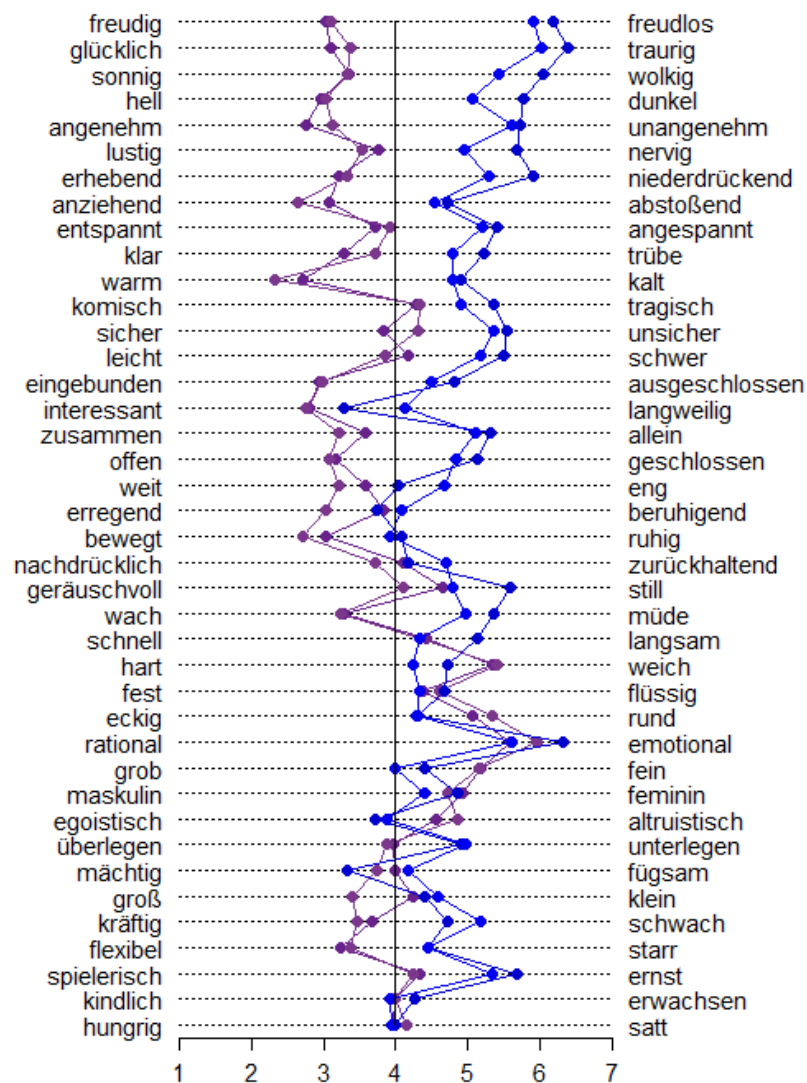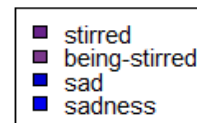

Supplement: pone.0128451.s013.pdf [file pone.0128451.s013.pdf]
