# Supplementary material for: Towards a Psychological Construct of Being Moved
Source: PubMed Central journal article supplement (PMC4456364; doi:10.1371/journal.pone.0128451), 2015-06-04

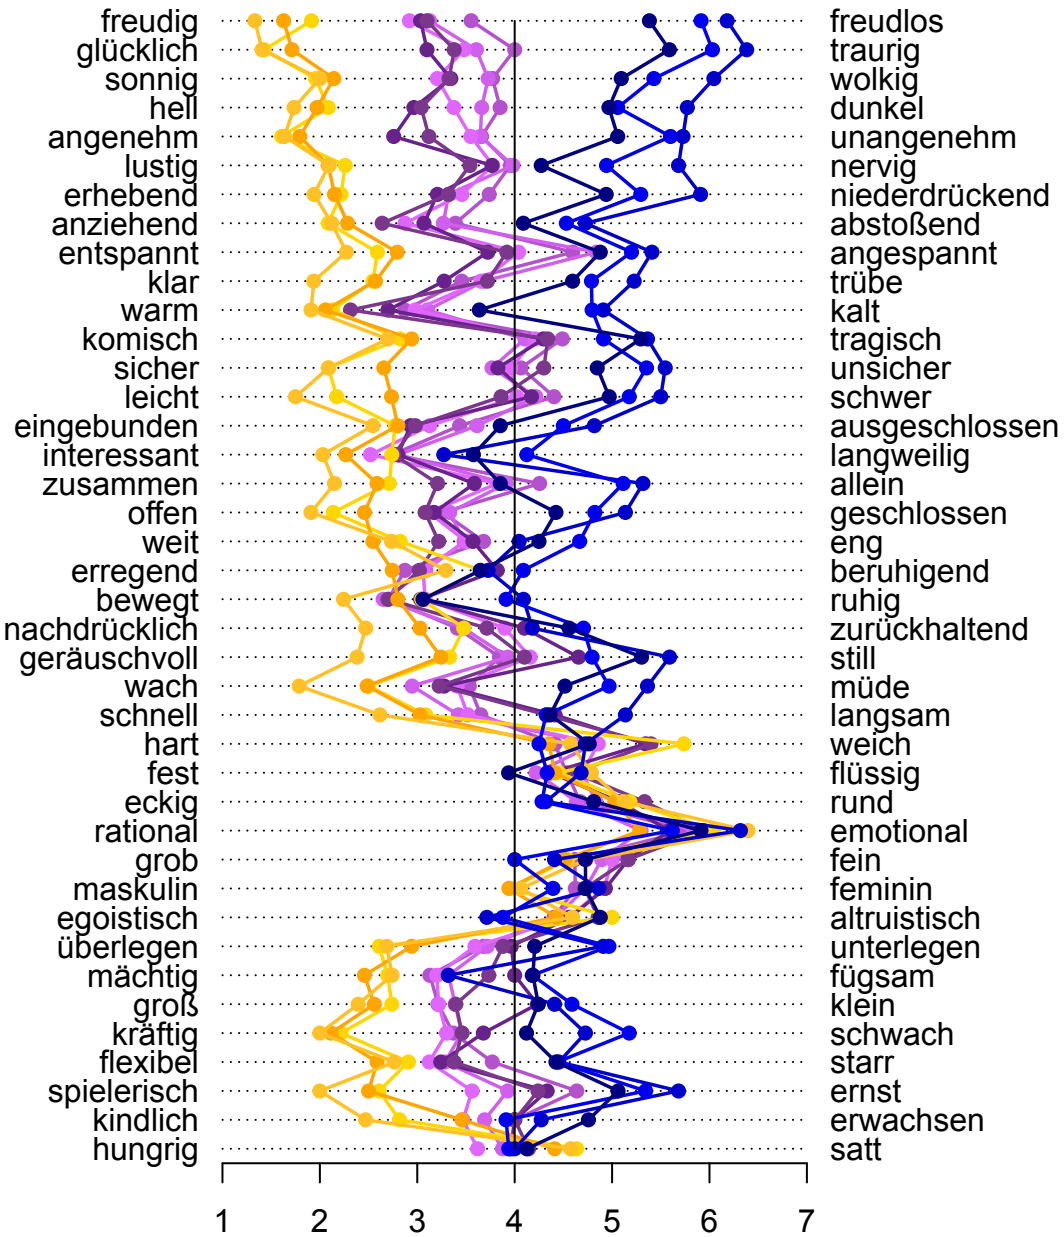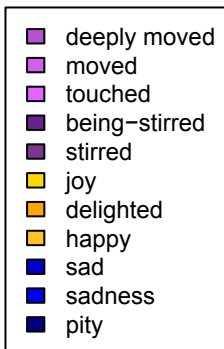

Supplement: pone.0128451.s004.pdf [file pone.0128451.s004.pdf]
