# Supplementary material for: Towards a Psychological Construct of Being Moved
Source: PubMed Central journal article supplement (PMC4456364; doi:10.1371/journal.pone.0128451), 2015-06-04
Supplement: pone.0128451.s006.pdf [file pone.0128451.s006.pdf]

## Instruktion

In diesem Fragebogen bitten wir Sie, sich an Ereignisse zu erinnern, die Sie als bewegend erlebt haben. Es soll sich dabei um Ereignisse aus dem **realen Leben** handeln und *nicht* um Ereignisse, die Ihnen durch Film, Bücher, Nachrichtenmedien etc. vermittelt worden sind.

Bitte rufen Sie sich nun das stärkste bewegende Ereignis, an das Sie sich aus der letzten Zeit erinnern, ins Gedächtnis zurück. Versuchen Sie, sich an so viele Einzelheiten wie möglich zu erinnern, die für dieses Ereignis bedeutsam waren. Nehmen Sie sich jetzt zwei bis drei Minuten Zeit dazu.

Bitte beantworten Sie die nun folgenden Fragen, indem Sie die zutreffende Antwortkategorie auf der jeweiligen Skala ankreuzen. Falls eine bestimmte Frage für das jeweilige Ereignis nicht relevant ist, kreuzen Sie bitte die Antwort "Irrelevant" an.

**Es ist sehr wichtig, dass Sie alle Fragen beantworten und dass Sie nur eine Antwortkategorie für jede Frage ankreuzen.**

## Ereignis X

Bitte beschreiben Sie das bewegende Ereignis in einigen kurzen Sätzen. Beschreiben Sie, was passiert ist und ob daraus für Sie irgendwelche Konsequenzen entstanden sind.

---

---

---

---

---

---

### Eintreten des bewegenden Ereignisses

1. **Wie lange** liegt dieses Ereignis zurück?

Einige...

| Stunden | Tage | Wochen | Monate | Jahre |
|---------|------|--------|--------|-------|
|         |      |        |        |       |

2. **An welchem Ort** befanden Sie sich, als Sie die Emotion erlebten?

- In meiner eigenen Wohnung
- In der Wohnung von Freunden oder Bekannten
- Am Arbeitsplatz
- In einem Kino-, Konzert-, Theatersaal, Museum o.Ä.
- Auf der Straße oder an einem anderen öffentlichen Ort
- In der freien Natur
- \_\_\_\_\_

3. **Welche Personen waren zugegen**, als Sie das bewegende Ereignis erlebt haben?

- Niemand, ich war allein
- Ein Partner oder ein(e) Freund(in)
- Eine andere Person (Bekannter, Arbeitskollege)
- Mehrere Freunde oder Bekannte
- Eine oder mehrere unbekannte Personen
- Eine große Menschenmenge

## Allgemeine Bewertung des Ereignisses

Wie würden Sie die Art des Ereignisses **im Allgemeinen** einschätzen, also unabhängig von ihren spezifischen Bedürfnissen und Wünschen in der von Ihnen berichteten Situation? *(Um auch ambivalente Situationen erfassen zu können, bitten wir Sie, beide Skalen auszufüllen)*

|               | ganz und gar nicht       | ziemlich                 | in höchstem Maße         | irrelevant               |   |
|---------------|--------------------------|--------------------------|--------------------------|--------------------------|---|
| 4. angenehm   | <input type="checkbox"/> | <input type="checkbox"/> | <input type="checkbox"/> | <input type="checkbox"/> | 0 |
| 5. unangenehm | <input type="checkbox"/> | <input type="checkbox"/> | <input type="checkbox"/> | <input type="checkbox"/> | 0 |

## Merkmale des Ereignisses

Als Sie bewegt waren, dachten Sie, dass

|                                                                                                                | ganz und gar nicht       | ziemlich                 | in höchstem Maße         | irrelevant               |   |
|----------------------------------------------------------------------------------------------------------------|--------------------------|--------------------------|--------------------------|--------------------------|---|
| 6. das Ereignis sehr <b>plötzlich und abrupt</b> eingetreten ist?                                              | <input type="checkbox"/> | <input type="checkbox"/> | <input type="checkbox"/> | <input type="checkbox"/> | 0 |
| 7. Sie das Eintreten des Ereignisses hätten <b>vorhersagen</b> können?                                         | <input type="checkbox"/> | <input type="checkbox"/> | <input type="checkbox"/> | <input type="checkbox"/> | 0 |
| 8. Ihnen diese Art von Ereignis <b>vertraut</b> war?                                                           | <input type="checkbox"/> | <input type="checkbox"/> | <input type="checkbox"/> | <input type="checkbox"/> | 0 |
| 9. das Ereignis für Sie persönlich <b>sehr bedeutsame Folgen</b> haben würde?                                  | <input type="checkbox"/> | <input type="checkbox"/> | <input type="checkbox"/> | <input type="checkbox"/> | 0 |
| 10a. das Verhalten, das das Ereignis ausgelöst hat, aus <b>moralischer und ethischer Sicht akzeptabel</b> war? | <input type="checkbox"/> | <input type="checkbox"/> | <input type="checkbox"/> | <input type="checkbox"/> | 0 |
| 10b. das Verhalten, das das Ereignis ausgelöst hat, <b>moralischen und ethischen Idealen</b> gerecht wurde?    | <input type="checkbox"/> | <input type="checkbox"/> | <input type="checkbox"/> | <input type="checkbox"/> | 0 |

**Ursache des Ereignisses** (*bitte berücksichtigen Sie, dass oft mehrere Ursachen beteiligt sein können*)

Als das Ereignis geschah, in welchem Maße war es Ihrer Meinung nach durch einen oder mehrere der folgenden Faktoren verursacht?

|                                                                                       | ganz und gar nicht       | ziemlich                 | in höchstem Maße         | irrelevant               |                       |
|---------------------------------------------------------------------------------------|--------------------------|--------------------------|--------------------------|--------------------------|-----------------------|
| 12. Zufall, besondere Umstände oder höhere Gewalt?                                    | <input type="checkbox"/> | <input type="checkbox"/> | <input type="checkbox"/> | <input type="checkbox"/> | <input type="radio"/> |
| 13. Ihr eigenes Verhalten?                                                            | <input type="checkbox"/> | <input type="checkbox"/> | <input type="checkbox"/> | <input type="checkbox"/> | <input type="radio"/> |
| 14. Wenn ja, wurde das Ereignis <b>absichtlich</b> von Ihnen verursacht?              | <input type="checkbox"/> | <input type="checkbox"/> | <input type="checkbox"/> | <input type="checkbox"/> | <input type="radio"/> |
| 15. Wenn ja, war Ihr Verhalten mit Ihrem Selbstbild vereinbar?                        | <input type="checkbox"/> | <input type="checkbox"/> | <input type="checkbox"/> | <input type="checkbox"/> | <input type="radio"/> |
| 16. das Verhalten (einer) anderen/anderer Person(en)?                                 | <input type="checkbox"/> | <input type="checkbox"/> | <input type="checkbox"/> | <input type="checkbox"/> | <input type="radio"/> |
| 17. Wenn ja, wurde es <b>absichtlich</b> von der (den) anderen Person(en) verursacht? | <input type="checkbox"/> | <input type="checkbox"/> | <input type="checkbox"/> | <input type="checkbox"/> | <input type="radio"/> |

## Konsequenzen des Ereignisses

Als Sie bewegt waren, dachten Sie, dass die tatsächlichen oder möglichen Konsequenzen des Ereignisses

|                                                                                                                                   | ganz und gar nicht       | ziemlich                 | in höchstem Maße         | irrelevant               |   |
|-----------------------------------------------------------------------------------------------------------------------------------|--------------------------|--------------------------|--------------------------|--------------------------|---|
| 18. bereits von Ihnen <b>verspürt</b> wurden oder <b>eindeutig absehbar</b> waren?                                                | <input type="checkbox"/> | <input type="checkbox"/> | <input type="checkbox"/> | <input type="checkbox"/> | 0 |
| 19. von Ihnen in <b>dieser</b> Form und zu <b>diesem</b> Zeitpunkt <b>erwartet</b> wurden?                                        | <input type="checkbox"/> | <input type="checkbox"/> | <input type="checkbox"/> | <input type="checkbox"/> | 0 |
| 20. <b>klar vorhersehbar</b> und für die <b>nahe Zukunft</b> zu erwarten waren (mit ziemlich <b>hoher</b> Wahrscheinlichkeit)?    | <input type="checkbox"/> | <input type="checkbox"/> | <input type="checkbox"/> | <input type="checkbox"/> | 0 |
| 21. <b>unvorhersehbar</b> waren aber in der <b>fernen Zukunft</b> auftreten könnten (mit <b>unbestimmter</b> Wahrscheinlichkeit)? | <input type="checkbox"/> | <input type="checkbox"/> | <input type="checkbox"/> | <input type="checkbox"/> | 0 |
| 22a. für Sie <b>positive, wünschenswerte Auswirkungen</b> hatten?                                                                 | <input type="checkbox"/> | <input type="checkbox"/> | <input type="checkbox"/> | <input type="checkbox"/> | 0 |
| 22b. Falls ja,                                                                                                                    |                          |                          |                          |                          |   |
| - waren die Konsequenzen für das <b>Erreichen Ihrer Ziele</b> nützlich?                                                           | <input type="checkbox"/> | <input type="checkbox"/> | <input type="checkbox"/> | <input type="checkbox"/> | 0 |
| - Bereiteten sie <b>Befriedigung</b> ?                                                                                            | <input type="checkbox"/> | <input type="checkbox"/> | <input type="checkbox"/> | <input type="checkbox"/> | 0 |
| - Beendeten sie ein <b>unangenehme Situation</b> ?                                                                                | <input type="checkbox"/> | <input type="checkbox"/> | <input type="checkbox"/> | <input type="checkbox"/> | 0 |
| 23a. für Sie <b>negative, unerwünschte Auswirkungen</b> hatten?                                                                   | <input type="checkbox"/> | <input type="checkbox"/> | <input type="checkbox"/> | <input type="checkbox"/> | 0 |
| 23b. Falls ja,                                                                                                                    |                          |                          |                          |                          |   |
| - waren die Konsequenzen für das <b>Erreichen Ihrer Ziele</b> hinderlich?                                                         | <input type="checkbox"/> | <input type="checkbox"/> | <input type="checkbox"/> | <input type="checkbox"/> | 0 |
| - Verhinderten sie die <b>Befriedigung</b> von Bedürfnissen?                                                                      | <input type="checkbox"/> | <input type="checkbox"/> | <input type="checkbox"/> | <input type="checkbox"/> | 0 |
| - Führten sie körperliche <b>Verletzungen oder unangenehme Gefühle</b> herbei?                                                    | <input type="checkbox"/> | <input type="checkbox"/> | <input type="checkbox"/> | <input type="checkbox"/> | 0 |

Als Sie bewegt waren, dachten Sie, dass die tatsächlichen oder möglichen Konsequenzen des Ereignisses

- |                                                                                                    | ganz und gar nicht       | ziemlich                 | in höchstem Maße         | irrelevant               |
|----------------------------------------------------------------------------------------------------|--------------------------|--------------------------|--------------------------|--------------------------|
| 24. <b>ungerecht</b> oder <b>unfair</b> waren?                                                     | <input type="checkbox"/> | <input type="checkbox"/> | <input type="checkbox"/> | <input type="checkbox"/> |
| 25. durch <b>geeignetes menschliches Handeln vermieden</b> oder <b>modifiziert</b> werden konnten? | <input type="checkbox"/> | <input type="checkbox"/> | <input type="checkbox"/> | <input type="checkbox"/> |

### Reaktionen angesichts der tatsächlichen oder erwarteten Konsequenzen

Nachdem Sie klare Vorstellungen über die wahrscheinlichen Auswirkungen des Ereignisses hatten, dachten Sie

- |                                                                                                                                     | ganz und gar nicht       | ziemlich                 | in höchstem Maße         | irrelevant               |
|-------------------------------------------------------------------------------------------------------------------------------------|--------------------------|--------------------------|--------------------------|--------------------------|
| 26. <b>unmittelbar</b> darauf reagieren zu müssen?                                                                                  | <input type="checkbox"/> | <input type="checkbox"/> | <input type="checkbox"/> | <input type="checkbox"/> |
| 27. die <b>Auswirkungen verhindern</b> oder zu Ihrem <b>Vorteil verändern</b> zu können (mit eigener Kraft oder der Hilfe anderer)? | <input type="checkbox"/> | <input type="checkbox"/> | <input type="checkbox"/> | <input type="checkbox"/> |
| 28. mit den nicht beeinflussbaren Folgen und Auswirkungen des Ereignisses <b>leben</b> und <b>sich daran anpassen</b> zu können?    | <input type="checkbox"/> | <input type="checkbox"/> | <input type="checkbox"/> | <input type="checkbox"/> |

### Intensität und Dauer des emotionalen Erlebens

29a. Wie war das Gefühl, das Sie während der oben beschriebenen Emotionsepisode verspürt haben?

- |            | ganz und gar nicht       | ziemlich                 | in höchstem Maße         | irrelevant               |
|------------|--------------------------|--------------------------|--------------------------|--------------------------|
| unangenehm | <input type="checkbox"/> | <input type="checkbox"/> | <input type="checkbox"/> | <input type="checkbox"/> |
| angenehm   | <input type="checkbox"/> | <input type="checkbox"/> | <input type="checkbox"/> | <input type="checkbox"/> |

29b. Wie **intensiv** war das Gefühl, das Sie während der oben beschriebenen Emotionsepisode verspürt haben?

schwach mittel stark

30. Wie **lange** hat die emotionale Erfahrung gedauert?

ein paar...

| Sekunden | Minuten | Stunden | Tage | Wochen |
|----------|---------|---------|------|--------|
|          |         |         |      |        |

31. In welchem Maße haben Sie versucht, die **Intensität** Ihres Emotionserlebens **zu vermindern** und die **Dauer abzukürzen**?

ganz und gar nicht ziemlich in höchstem Maße irrelevant

○

32. In welchem Maße haben Sie versucht, den **Ausdruck** Ihrer Emotion **zu kontrollieren** oder **zu unterdrücken**, um sie gegenüber Ihrer Umwelt zu verbergen?

ganz und gar nicht ziemlich in höchstem Maße irrelevant

○

### Verbale Beschreibung des emotionalen Erlebens

33. Wie würden Sie das Emotionserleben **mit Ihren eigenen Worten** benennen? Bitte schreiben Sie einen Begriff oder einen kurzen Satz in den nebenstehenden Kasten.

Bitte entscheiden Sie, welcher der unten aufgeführten Emotionsbegriffe Ihrem oben berichteten Emotionserleben **am ehesten entspricht**. Markieren Sie denjenigen Begriff mit einem Kreuz, der Ihren damaligen Gefühlszustand am besten beschreibt. Sollten Sie ein „**Emotionsgemisch**“ oder zwei Emotionen gleichzeitig empfunden haben, so können Sie auch zwei Begriffe ankreuzen. Markieren Sie bitte in diesem Fall die stärkere Emotion durch zwei Kreuze.

- |                                           |                                            |
|-------------------------------------------|--------------------------------------------|
| <input type="radio"/> <b>Traurigkeit</b>  | <input type="radio"/> <b>Ekel</b>          |
| <input type="radio"/> <b>Freude</b>       | <input type="radio"/> <b>Vergnügen</b>     |
| <input type="radio"/> <b>Wut</b>          | <input type="radio"/> <b>Verzweiflung</b>  |
| <input type="radio"/> <b>Angst</b>        | <input type="radio"/> <b>Stolz</b>         |
| <input type="radio"/> <b>Überraschung</b> | <input type="radio"/> <b>Erleichterung</b> |
| <input type="radio"/> <b>Furcht</b>       | <input type="radio"/> <b>Faszination</b>   |
| <input type="radio"/> <b>Verärgerung</b>  | <input type="radio"/> <b>Verachtung</b>    |
| <input type="radio"/> <b>Scham</b>        | <input type="radio"/> <b>Schuld</b>        |

- Keiner der oben aufgeführten Emotionsbegriffe entspricht dem, was ich in dieser Emotionsepisode gefühlt habe

### Angaben zur Person

Alter \_\_\_\_\_

Geschlecht männlich  weiblich

Muttersprache \_\_\_\_\_
