# Supplementary material for: Towards a Psychological Construct of Being Moved
Source: PubMed Central journal article supplement (PMC4456364; doi:10.1371/journal.pone.0128451), 2015-06-04
Supplement: pone.0128451.s008.pdf [file pone.0128451.s008.pdf]

| emotional bewegt |                                                                                                                                                                                                                       |                |
|------------------|-----------------------------------------------------------------------------------------------------------------------------------------------------------------------------------------------------------------------|----------------|
| angespannt       | <input type="radio"/> - <input type="radio"/> | entspannt      |
| egoistisch       | <input type="radio"/> - <input type="radio"/> | altruistisch   |
| warm             | <input type="radio"/> - <input type="radio"/> | kalt           |
| weit             | <input type="radio"/> - <input type="radio"/> | eng            |
| erhebend         | <input type="radio"/> - <input type="radio"/> | niederdrückend |
| ernst            | <input type="radio"/> - <input type="radio"/> | spielerisch    |
| bewegt           | <input type="radio"/> - <input type="radio"/> | ruhig          |
| geräuschvoll     | <input type="radio"/> - <input type="radio"/> | still          |
| schnell          | <input type="radio"/> - <input type="radio"/> | langsam        |
| erregend         | <input type="radio"/> - <input type="radio"/> | beruhigend     |
| fest             | <input type="radio"/> - <input type="radio"/> | flüssig        |
| grob             | <input type="radio"/> - <input type="radio"/> | fein           |
| tragisch         | <input type="radio"/> - <input type="radio"/> | komisch        |
| wach             | <input type="radio"/> - <input type="radio"/> | müde           |
| hungrig          | <input type="radio"/> - <input type="radio"/> | satt           |
| integriert       | <input type="radio"/> - <input type="radio"/> | isoliert       |
| klar             | <input type="radio"/> - <input type="radio"/> | trübe          |
| anziehend        | <input type="radio"/> - <input type="radio"/> | abstoßend      |
| angenehm         | <input type="radio"/> - <input type="radio"/> | unangenehm     |
| freudig          | <input type="radio"/> - <input type="radio"/> | freudlos       |
| hell             | <input type="radio"/> - <input type="radio"/> | dunkel         |
| kindlich         | <input type="radio"/> - <input type="radio"/> | erwachsen      |
| langweilig       | <input type="radio"/> - <input type="radio"/> | interessant    |
| sonnig           | <input type="radio"/> - <input type="radio"/> | wolkig         |
| starr            | <input type="radio"/> - <input type="radio"/> | flexibel       |
| lustig           | <input type="radio"/> - <input type="radio"/> | nervig         |
| maskulin         | <input type="radio"/> - <input type="radio"/> | feminin        |
| hart             | <input type="radio"/> - <input type="radio"/> | weich          |
| mächtig          | <input type="radio"/> - <input type="radio"/> | fügsam         |
| kräftig          | <input type="radio"/> - <input type="radio"/> | schwach        |
| nachdrücklich    | <input type="radio"/> - <input type="radio"/> | zurückhaltend  |
| überlegen        | <input type="radio"/> - <input type="radio"/> | unterlegen     |
| traurig          | <input type="radio"/> - <input type="radio"/> | glücklich      |
| offen            | <input type="radio"/> - <input type="radio"/> | geschlossen    |
| rational         | <input type="radio"/> - <input type="radio"/> | emotional      |
| schwer           | <input type="radio"/> - <input type="radio"/> | leicht         |
| sicher           | <input type="radio"/> - <input type="radio"/> | unsicher       |
| groß             | <input type="radio"/> - <input type="radio"/> | klein          |

Bitte charakterisieren Sie das Gefühl, das Sie empfinden, wenn Sie emotional **bewegt** sind.

Schätzen Sie dieses Gefühl anhand der untenstehenden Skalen ein, indem Sie den Wert ankreuzen, der Ihre Gefühlslage am zutreffendsten beschreibt.

Treffen Sie Ihre Entscheidungen spontan und beurteilen Sie bitte alle Skalen, auch wenn Ihnen eventuell einige unzutreffend erscheinen.

Alter \_\_\_\_\_ Geschlecht \_\_\_\_\_

Muttersprache \_\_\_\_\_
