# Supplementary material for: Towards a Psychological Construct of Being Moved
Source: PubMed Central journal article supplement (PMC4456364; doi:10.1371/journal.pone.0128451), 2015-06-04
Supplement: pone.0128451.s009.pdf [file pone.0128451.s009.pdf]

**S1 Table** Differences between terms of the being-moved group.

| Adjective pairs               | Being moved | Being stirred | Difference | <i>t</i> | <i>p</i> |
|-------------------------------|-------------|---------------|------------|----------|----------|
| freudig – freudlos            | 3.10        | 3.13          | -0.03      | -0.09    | .925     |
| traurig – glücklich           | 4.62        | 4.39          | 0.23       | 0.73     | .468     |
| sonnig – wolkig               | 3.33        | 3.73          | -0.40      | -1.24    | .219     |
| hell – dunkel                 | 3.04        | 3.66          | -0.62      | -2.06*   | .042     |
| angenehm – unangenehm         | 3.12        | 3.65          | -0.53      | -2.03*   | .045     |
| lustig – nervig               | 3.54        | 3.98          | -0.44      | -1.84    | .069     |
| erhebend – niederdrückend     | 3.32        | 3.32          | -0.00      | -0.01    | .996     |
| anziehend – abstoßend         | 2.64        | 3.27          | -0.63      | -2.76**  | .007     |
| angespannt – entspannt        | 4.08        | 3.16          | 0.92       | 3.03**   | .003     |
| warm – kalt                   | 2.31        | 3.11          | -0.79      | -2.67**  | .009     |
| klar – trübe                  | 3.72        | 3.68          | 0.04       | 0.12     | .903     |
| tragisch – komisch            | 3.66        | 3.89          | -0.23      | -0.99    | .327     |
| sicher – unsicher             | 4.30        | 3.77          | 0.53       | 1.86     | .065     |
| schwer – leicht               | 4.14        | 3.78          | 0.36       | 1.18     | .240     |
| eingebunden – ausgeschlossen  | 2.98        | 3.61          | -0.63      | -2.32*   | .022     |
| langweilig – interessant      | 5.24        | 5.19          | 0.05       | 0.18     | .854     |
| allein – zusammen             | 4.79        | 4.09          | 0.70       | 2.10*    | .038     |
| offen – geschlossen           | 3.08        | 3.33          | -0.25      | -0.89    | .375     |
| weit – eng                    | 3.22        | 3.48          | -0.26      | -0.89    | .373     |
| erregend – beruhigend         | 3.02        | 3.09          | -0.07      | -0.24    | .814     |
| bewegt – ruhig                | 2.70        | 2.65          | 0.05       | 0.14     | .886     |
| nachdrücklich – zurückhaltend | 3.71        | 3.47          | 0.24       | 0.78     | .437     |
| geräuschvoll – still          | 4.10        | 3.93          | 0.17       | 0.47     | .637     |
| wach – müde                   | 3.22        | 2.95          | 0.28       | 0.90     | .370     |
| schnell – langsam             | 4.33        | 3.42          | 0.91       | 2.80**   | .006     |
| hart – weich                  | 5.40        | 4.82          | 0.58       | 2.15*    | .034     |
| fest – flüssig                | 4.61        | 4.22          | 0.39       | 1.41     | .162     |
| eckig – rund                  | 5.33        | 4.64          | 0.70       | 2.47*    | .015     |
| rational – emotional          | 5.94        | 5.30          | 0.64       | 1.97     | .051     |
| grob – fein                   | 5.16        | 4.89          | 0.27       | 1.08     | .284     |
| maskulin – feminin            | 4.72        | 4.73          | -0.01      | -0.02    | .983     |
| egoistisch – altruistisch     | 4.86        | 4.42          | 0.44       | 1.52     | .132     |
| überlegen – unterlegen        | 3.88        | 3.72          | 0.16       | 0.59     | .554     |
| mächtig – fügsam              | 3.73        | 3.32          | 0.41       | 1.51     | .134     |
| groß – klein                  | 3.40        | 3.39          | 0.01       | 0.02     | .982     |
| kräftig – schwach             | 3.46        | 3.46          | 0.00       | 0.01     | .990     |
| starr – flexibel              | 4.62        | 4.71          | -0.09      | -0.36    | .720     |
| ernst – spielerisch           | 3.76        | 4.07          | -0.31      | -0.94    | .350     |
| kindlich – erwachsen          | 4.00        | 3.69          | 0.31       | 0.93     | .354     |
| hungrig – satt                | 4.14        | 3.88          | 0.27       | 0.86     | .391     |

Note. No correction for multiple testing was applied; using the Bonferroni-correction (.05 / 40 = .00125) would yield no significant difference.
