# Supplementary material for: Towards a Psychological Construct of Being Moved
Source: PubMed Central journal article supplement (PMC4456364; doi:10.1371/journal.pone.0128451), 2015-06-04
Supplement: pone.0128451.s012.pdf [file pone.0128451.s012.pdf]

**Analysis of the *not applicable* answers for the rating scales.**

Regarding the rating scales, we also analyzed the extent to which participants rated the items as relevant or not relevant for the event they described. Overall, 16.9% of the rating-scale questions concerning appraisals were rated as *not applicable*. The distribution across appraisals turned out to be similar—with one exception—to the findings of [1] and [2]: novelty (4.0%), intrinsic pleasantness (5.9%), causation (24.2%), goal conduciveness (12.8%), and norm compatibility (29.2%); only coping potential (22.4%) had a much higher inapplicability score in our study than in the two reference studies. For the three different event-type groups, the total percentage of appraisals rated as inapplicable was 17.6% for own-life events, 17.0% for media-represented real events, and 15.6% for fictional events.

**References**

1. Scherer KR (1997) Profiles of emotion-antecedent appraisal: Testing theoretical predictions across cultures. *Cogn Emot* 11: 113–150. doi:10.1080/026999397379962.
2. Tong EMW (2010) The sufficiency and necessity of appraisals for negative emotions. *Cogn Emot* 24: 692–701. doi:10.1080/13854040902933601.
